# Supplementary material for: Di(2-picolyl)amine-functionalized poly(ethylene glycol) hydrogels with tailorable metal–ligand coordination crosslinking
Source: Royal Society of Chemistry journal article supplement (doi:10.1039/d1py01325d), 2021-01-01
Supplement: d1py01325d1.pdf [file d1py01325d1.pdf]

## Supporting Information

### **Di(2-picoyl)amine-functionalized poly(ethylene glycol) hydrogels with tailorable metal-ligand coordination crosslinking**

Cheng-Hsuan Yu,<sup>a</sup> Pei-Yu Chiang,<sup>a</sup> Yi-Cheun Yeh<sup>a\*</sup>

<sup>a</sup>Institute of Polymer Science and Engineering, National Taiwan University, Taipei 10617, Taiwan

E-mail: yicheun@ntu.edu.tw

\*Corresponding Author:

E-mail: yicheun@ntu.edu.tw. (Yi-Cheun Yeh)

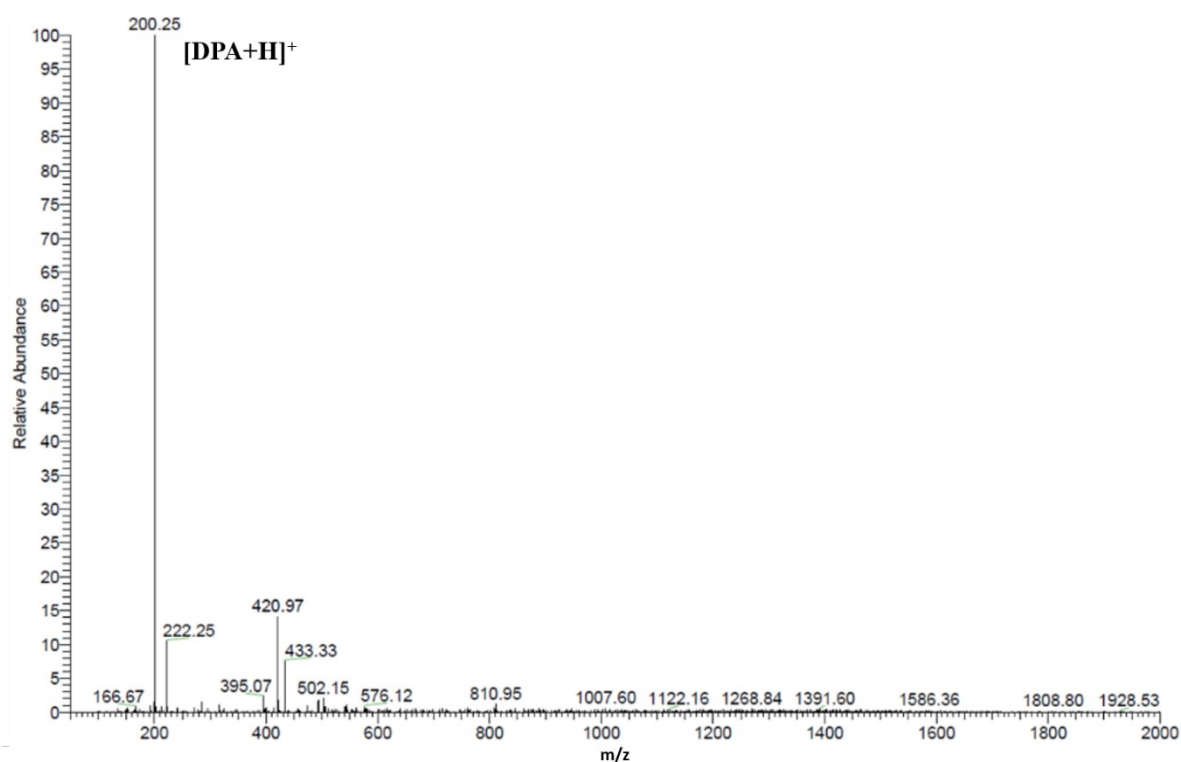

**Fig. S1** ESI spectrum of DPA molecule. The molecular weight of DPA is 199.11, thus the m/z signal of 200.25 is the  $[DPA+H]^+$  ion.

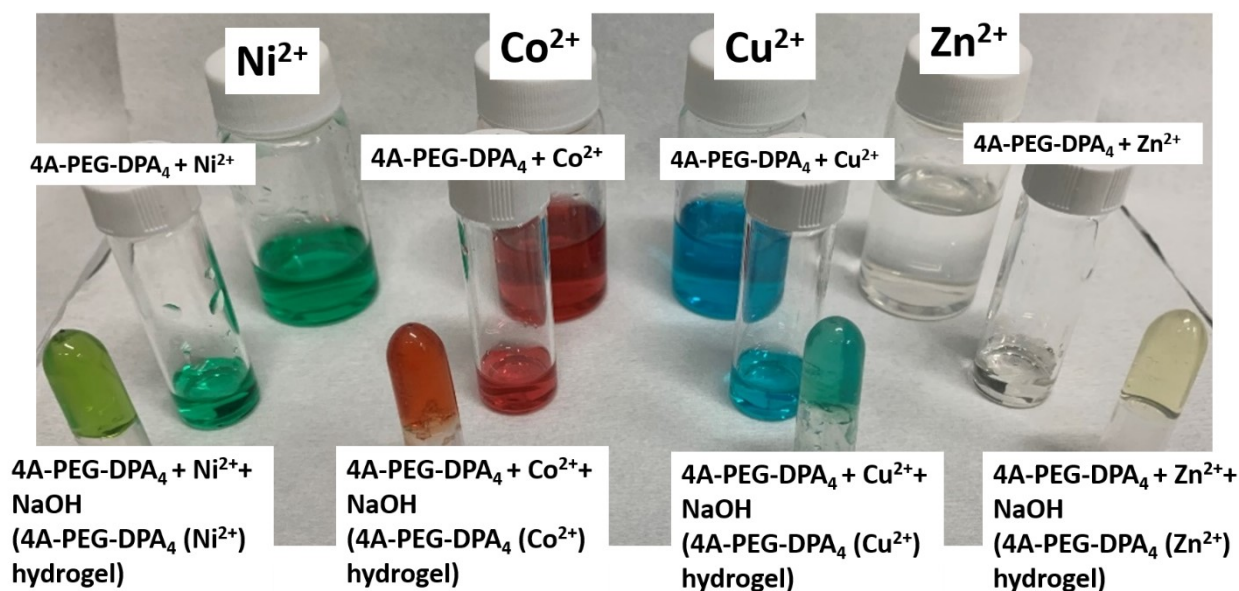

**Fig. S2** Images of solutions and hydrogels.

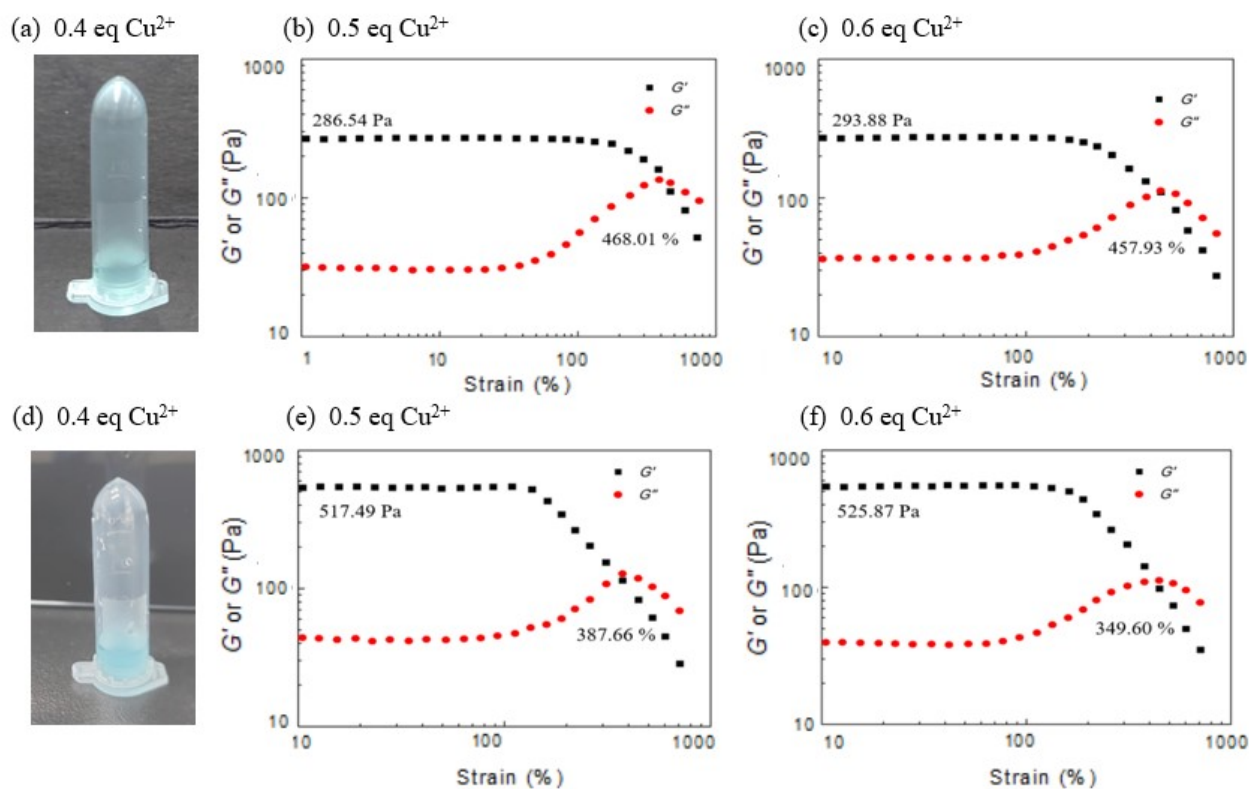

**Fig. S3** (a) Images of 4A-PEG-DPA<sub>4</sub> (Cu<sup>2+</sup>) hydrogels prepared with 0.4 eq of Cu<sup>2+</sup> ions. Oscillation strain sweeps of 4A-PEG-DPA<sub>4</sub> (Cu<sup>2+</sup>) hydrogel with (b) 0.5 eq and (c) 0.6 eq of Cu<sup>2+</sup> ions. (d) Images of 4A-PEG-DPA<sub>8</sub> (Cu<sup>2+</sup>) hydrogels prepared with 0.4 eq of Cu<sup>2+</sup> ions. Oscillation strain sweeps of 4A-PEG-DPA<sub>8</sub> (Cu<sup>2+</sup>) hydrogel with (e) 0.5 eq and (f) 0.6 eq of Cu<sup>2+</sup> ions.

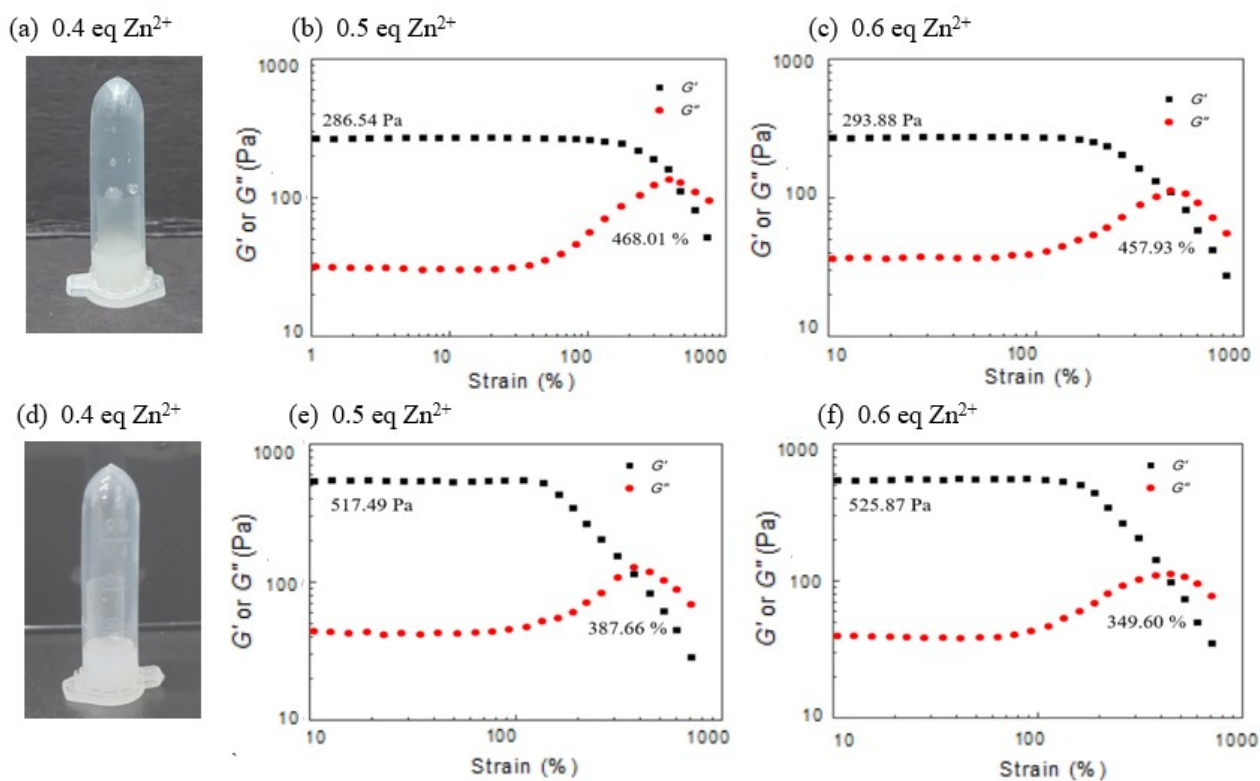

**Fig. S4** (a) Images of 4A-PEG-DPA<sub>4</sub> (Zn<sup>2+</sup>) hydrogels prepared with 0.4 eq of Zn<sup>2+</sup> ions. Oscillation strain sweeps of 4A-PEG-DPA<sub>4</sub> (Zn<sup>2+</sup>) hydrogel with (b) 0.5 eq and (c) 0.6 eq of Zn<sup>2+</sup> ions. (d) Images of 4A-PEG-DPA<sub>8</sub> (Zn<sup>2+</sup>) hydrogels prepared with 0.4 eq of Zn<sup>2+</sup> ions. Oscillation strain sweeps of 4A-PEG-DPA<sub>8</sub> (Zn<sup>2+</sup>) hydrogel with (e) 0.5 eq and (f) 0.6 eq of Zn<sup>2+</sup> ions.

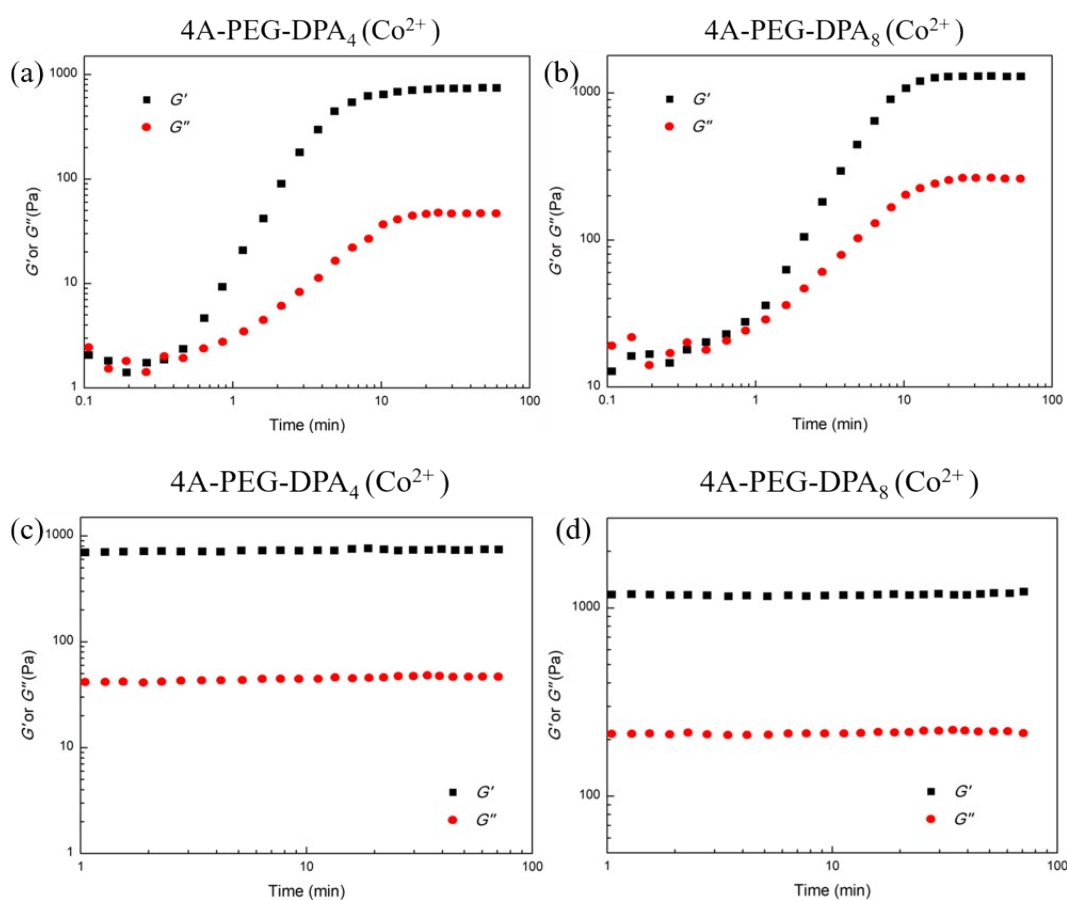

**Fig. S5** Oscillation time sweeps of (b) 4A-PEG-DPA<sub>4</sub> (Co<sup>2+</sup>) and (c) 4A-PEG-DPA<sub>8</sub> (Co<sup>2+</sup>) hydrogels, where the materials were quickly mixed and transferred on the plate of the rheometer. Oscillation time sweeps of (c) 4A-PEG-DPA<sub>4</sub>(Co<sup>2+</sup>) and (d) 4A-PEG-DPA<sub>8</sub> (Co<sup>2+</sup>) hydrogels, where the hydrogel was prepared and waited for 30 mins before loading on the plate of the rheometer.

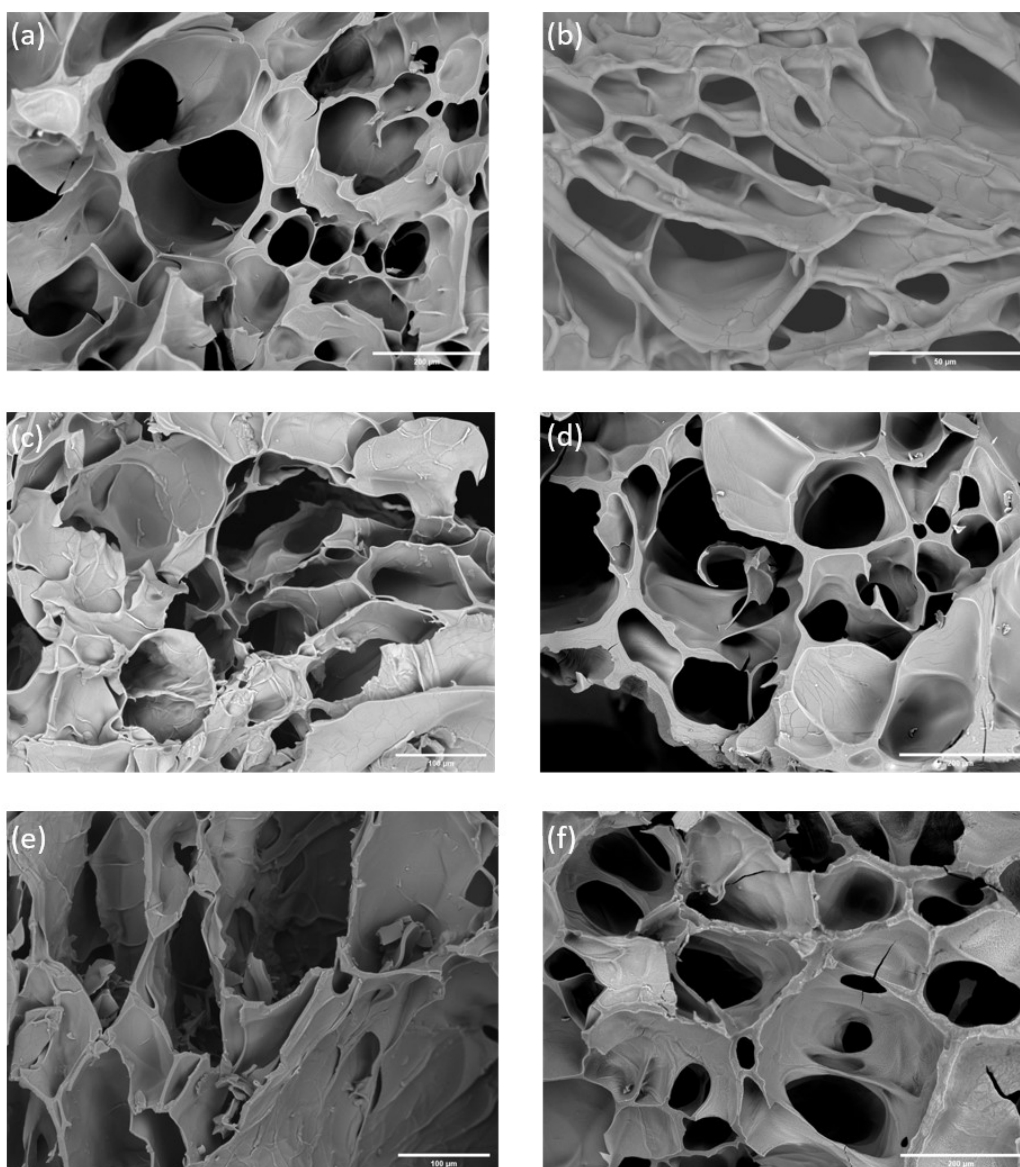

**Fig. S6** Representative SEM images of (a) 4A-PEG-DPA<sub>4</sub> (Ni<sup>2+</sup>), (b) 4A-PEG-DPA<sub>8</sub> (Ni<sup>2+</sup>), (c) 4A-PEG-DPA<sub>4</sub> (Cu<sup>2+</sup>), (d) 4A-PEG-DPA<sub>8</sub> (Cu<sup>2+</sup>), (e) 4A-PEG-DPA<sub>4</sub> (Zn<sup>2+</sup>), and (f) 4A-PEG-DPA<sub>8</sub> (Zn<sup>2+</sup>) hydrogels.

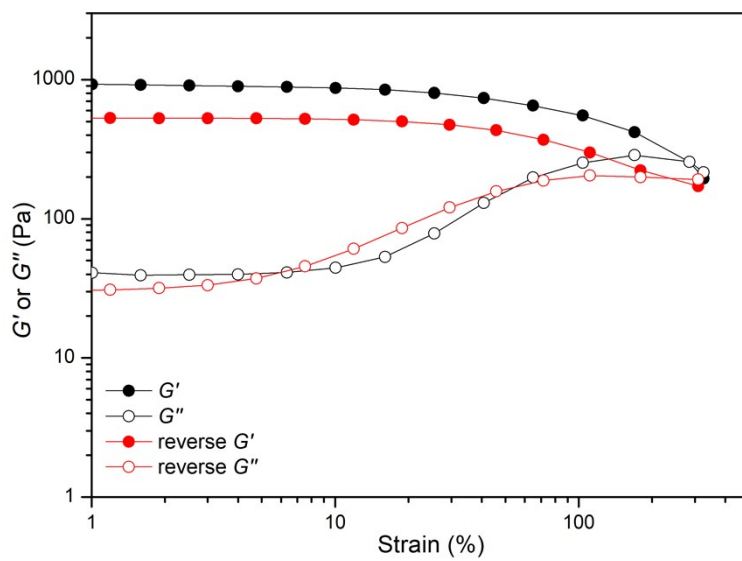

**Fig. S7** The reverse strain sweep of 4A-PEG-DPA<sub>8</sub> (Co<sup>2+</sup>) hydrogel.

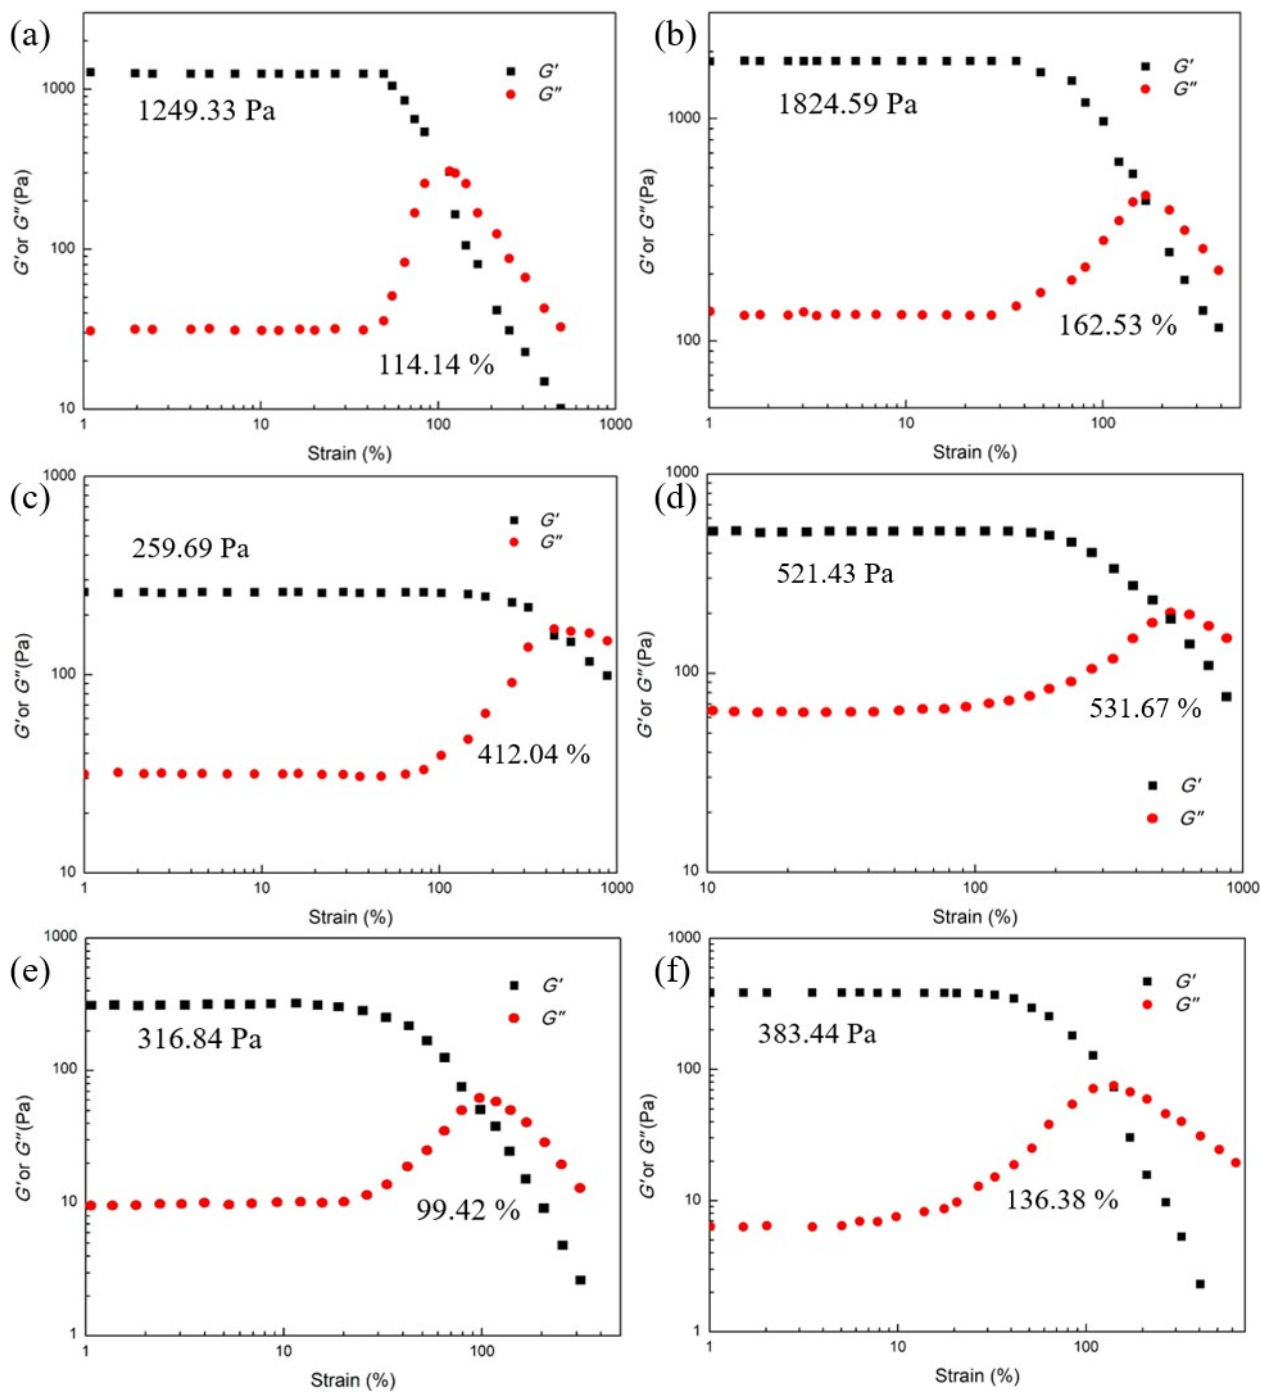

**Fig. S8** Representative oscillation strain sweeps of (a) 4A-PEG-DPA<sub>4</sub> (Ni<sup>2+</sup>), (b) 4A-PEG-DPA<sub>8</sub> (Ni<sup>2+</sup>), (c) 4A-PEG-DPA<sub>4</sub> (Cu<sup>2+</sup>), (d) 4A-PEG-DPA<sub>8</sub> (Cu<sup>2+</sup>), (e) 4A-PEG-DPA<sub>4</sub> (Zn<sup>2+</sup>), and (f) 4A-PEG-DPA<sub>8</sub> (Zn<sup>2+</sup>) hydrogels.
